# Supplementary material
Source: Springer Nature journal article supplement (https://www.springermedizin.de/resource/supplementary/13054_2013_3007_MOESM4_ESM.pdf/9712376)

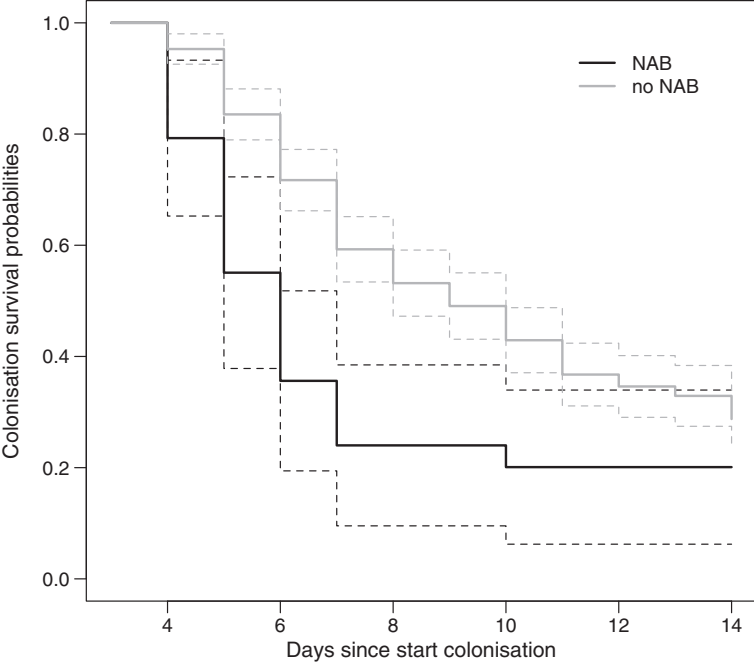

Supplement: MOESM4 [file 9712376]
